# Supplementary material for: Evaluation of Antibacterial Activity against Nosocomial Pathogens of an Enzymatically Derived α-Aminophosphonates Possessing Coumarin Scaffold
Source: MDPI journal article supplement (doi:10.3390/ijms241914886), 2023-10-04
Supplement: s1 [file s1]

# Evaluation of Antibacterial Activity against Nosocomial Pathogens of an Enzymatically Derived $\alpha$ -Aminophosphonates Possessing Coumarin Scaffold

Paweł Kowalczyk <sup>1,\*</sup>, Dominik Koszelewski <sup>2,\*</sup>, Anna Brodzka <sup>2</sup>, Karol Kramkowski <sup>3</sup> and Ryszard Ostaszewski <sup>2</sup>

<sup>1</sup> Department of Animal Nutrition, The Kielanowski Institute of Animal Physiology and Nutrition, Polish Academy of Sciences, Instytutcka 3, 05-110 Jabłonna, Poland

<sup>2</sup> Institute of Organic Chemistry, Polish Academy of Sciences, Kasprzaka 44/52, 01-224 Warsaw, Poland; anna.brodzka@icho.edu.pl (A.B.); ryszard.ostaszewski@icho.edu.pl (R.O.)

<sup>3</sup> Department of Physical Chemistry, Medical University of Białystok, Kilińskiego 1 Str., 15-089 Białystok, Poland; kkramk@wp.pl

\* Correspondence: p.kowalczyk@ifzz.pl (P.K.); dominik.koszelewski@icho.edu.pl (D.K.); Tel.: +48-227653301 (P.K.); +48-223432012 (D.K.)

**Dimethyl ((phenyl)((2-oxo-4-(trifluoromethyl)-2H-chromen-7-yl)amino)methyl) phosphonate (1):** <sup>1</sup>H NMR (400 MHz, CDCl<sub>3</sub>)  $\delta$  7.45 (ddd,  $J$  = 8.9, 6.0, 2.1 Hz, 3H), 7.40–7.29 (m, 3H), 6.67 (dd,  $J$  = 8.9, 2.4 Hz, 1H), 6.44 (dd,  $J$  = 10.2, 1.6 Hz, 2H), 5.85 (t,  $J$  = 8.8 Hz, 1H), 4.80 (dd,  $J$  = 24.2, 7.7 Hz, 1H), 3.80 (d,  $J$  = 10.9 Hz, 3H), 3.44 (d,  $J$  = 10.6 Hz, 3H); <sup>13</sup>C NMR (100 MHz, CDCl<sub>3</sub>)  $\delta$  158.9, 156.6, 150.4, 143.2, 141.6, 134.1, 129.1, 129.0, 127.6, 124.3, 112.3, 99.7, 55.9, 54.3, 53.7, 53.7.

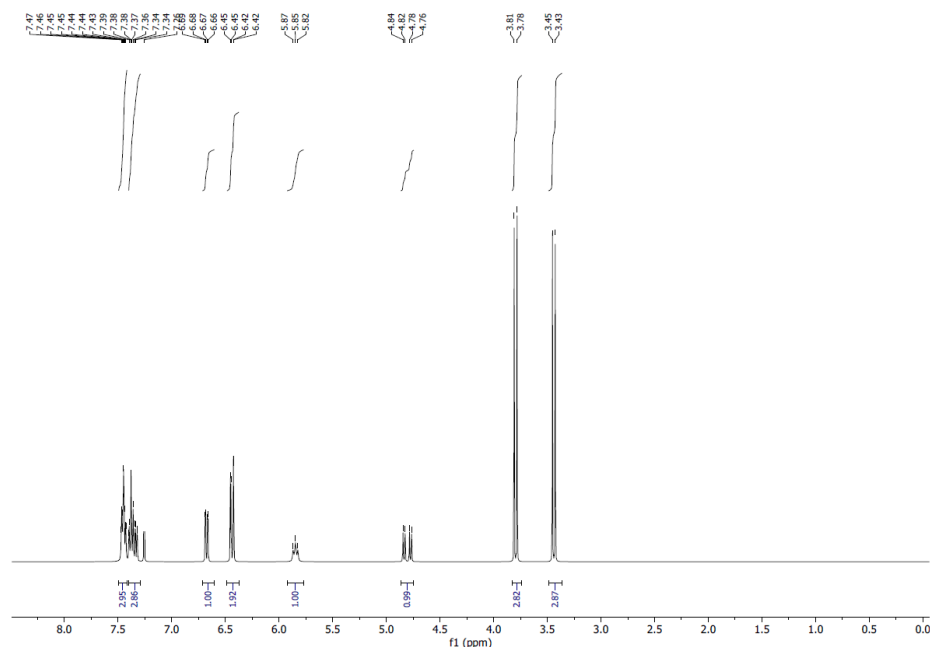

**Figure S1.** <sup>1</sup>H NMR (400 MHz, CDCl<sub>3</sub>) spectra of compound 1

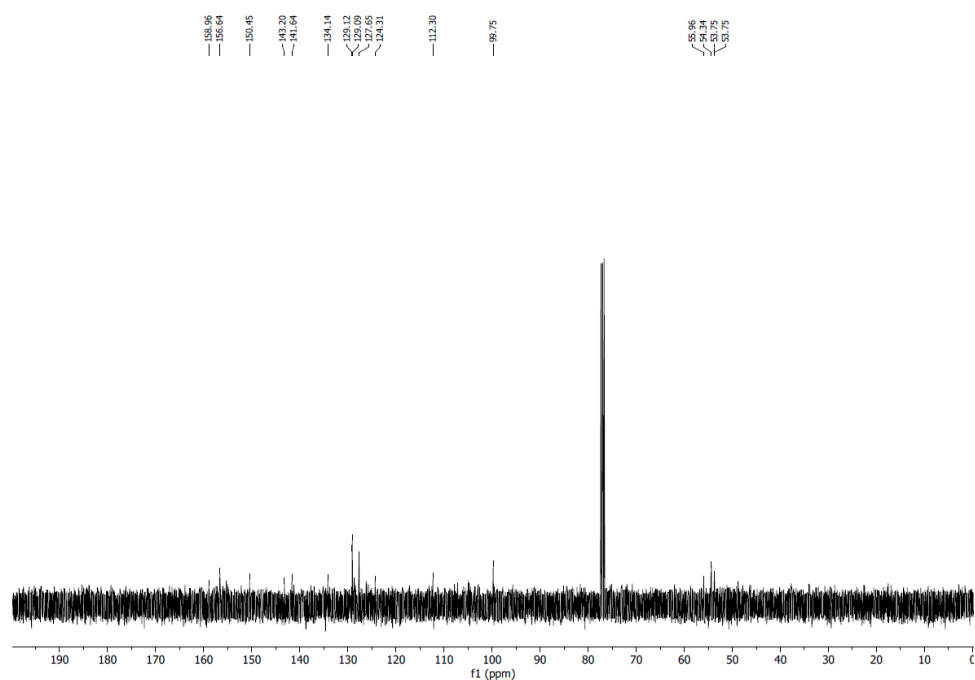

**Figure S2.**  $^{13}\text{C}$  NMR (100 MHz,  $\text{CDCl}_3$ ) spectra of compound **1**

**Dimethyl ((4-methoxyphenyl)((2-oxo-4-(trifluoromethyl)-2H-chromen-7-yl)amino)methyl)phosphonate (**2**).**  $^1\text{H}$  NMR (400 MHz,  $\text{CHCl}_3$ )  $\delta$  7.44–7.40 (m, 1H), 7.37 (dd,  $J$  = 8.8, 2.3 Hz, 2H), 6.89 (d,  $J$  = 8.4 Hz, 2H), 6.64 (dd,  $J$  = 8.9, 2.4 Hz, 1H), 6.43 (d,  $J$  = 8.4 Hz, 2H), 5.76 (t,  $J$  = 8.6 Hz, 1H), 4.75 (dd,  $J$  = 23.7, 7.6 Hz, 1H), 3.79 (s, 3H), 3.77 (d,  $J$  = 10.6 Hz, 3H), 3.46 (d,  $J$  = 10.6 Hz, 3H);  $^{13}\text{C}$  NMR (100 MHz,  $\text{CDCl}_3$ )  $\delta$  159.9, 156.6, 150.6, 150.5, 128.9, 128.8, 126.1, 125.8, 125.8, 114.6, 114.5, 112.3, 104.8, 99.7, 55.3, 54.2, 53.7, 53.6, 52.0.

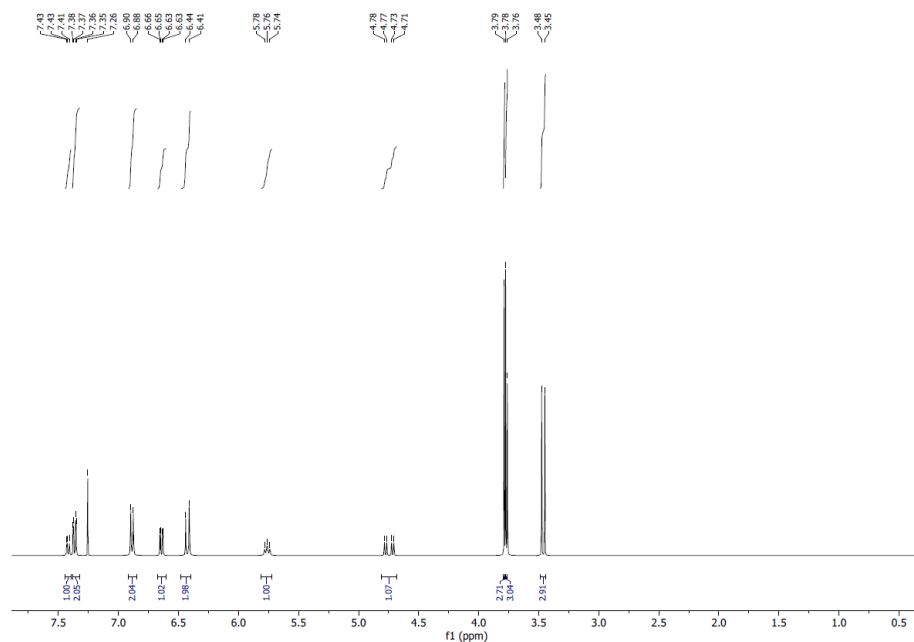

**Figure S3.**  $^1\text{H}$  NMR (400 MHz,  $\text{CDCl}_3$ ) spectra of compound **2**

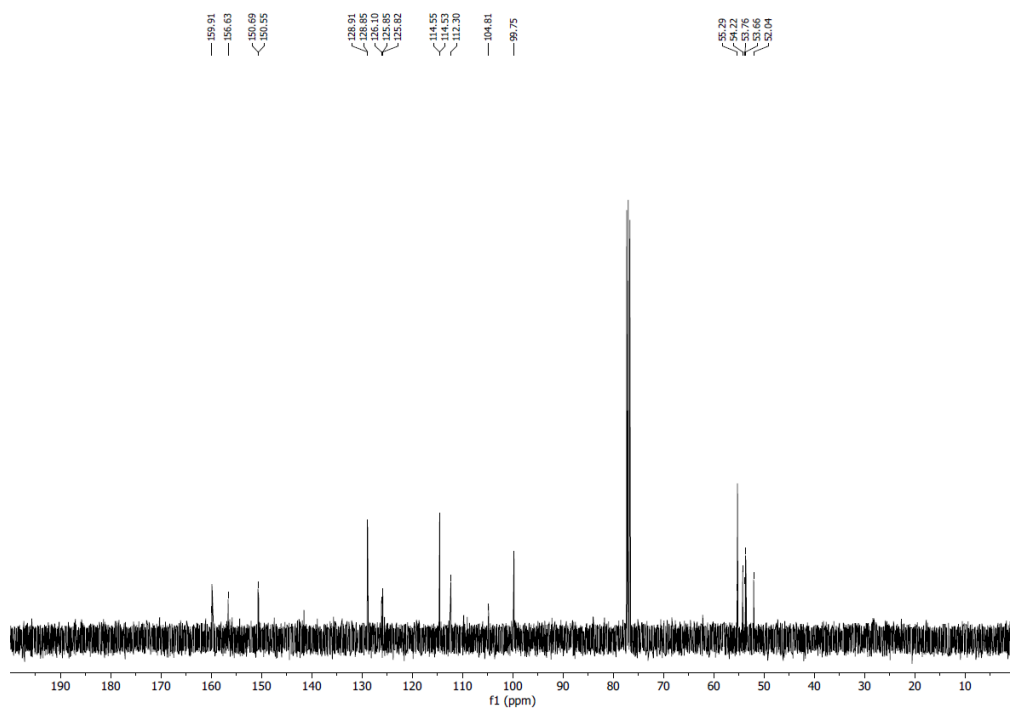

**Figure S4.**  $^{13}\text{C}$  NMR (100 MHz,  $\text{CDCl}_3$ ) spectra of compound **2**

**Dimethyl ((4-methylphenyl)((2-oxo-4-(trifluoromethyl)-2H-chromen-7-yl)amino)methyl)phosphonate (**3**).**  $^1\text{H}$  NMR (400 MHz,  $\text{CDCl}_3$ )  $\delta$  7.43 (dd,  $J = 8.9, 2.0$  Hz, 1H), 7.33 (dd,  $J = 8.2, 2.3$  Hz, 2H), 7.17 (d,  $J = 8.0$  Hz, 2H), 6.64 (dd,  $J = 8.9, 2.4$  Hz, 1H), 6.43 (d,  $J = 8.0$  Hz, 2H), 5.66 (t,  $J = 8.8$  Hz, 1H), 4.76 (dd,  $J = 23.9, 7.6$  Hz, 1H), 3.78 (d,  $J = 10.8$  Hz, 3H), 3.46 (d,  $J = 10.6$  Hz, 3H), 2.32 (s, 3H);  $^{13}\text{C}$  NMR (100 MHz,  $\text{CDCl}_3$ )  $\delta$  159.9, 156.6, 150.8, 150.7, 138.5, 131.1, 131.0, 129.8, 129.7, 127.7, 127.6, 126.0, 112.3, 109.6, 109.5, 104.7, 99.7, 55.6, 54.3, 54.2, 53.7, 52.0, 21.1.

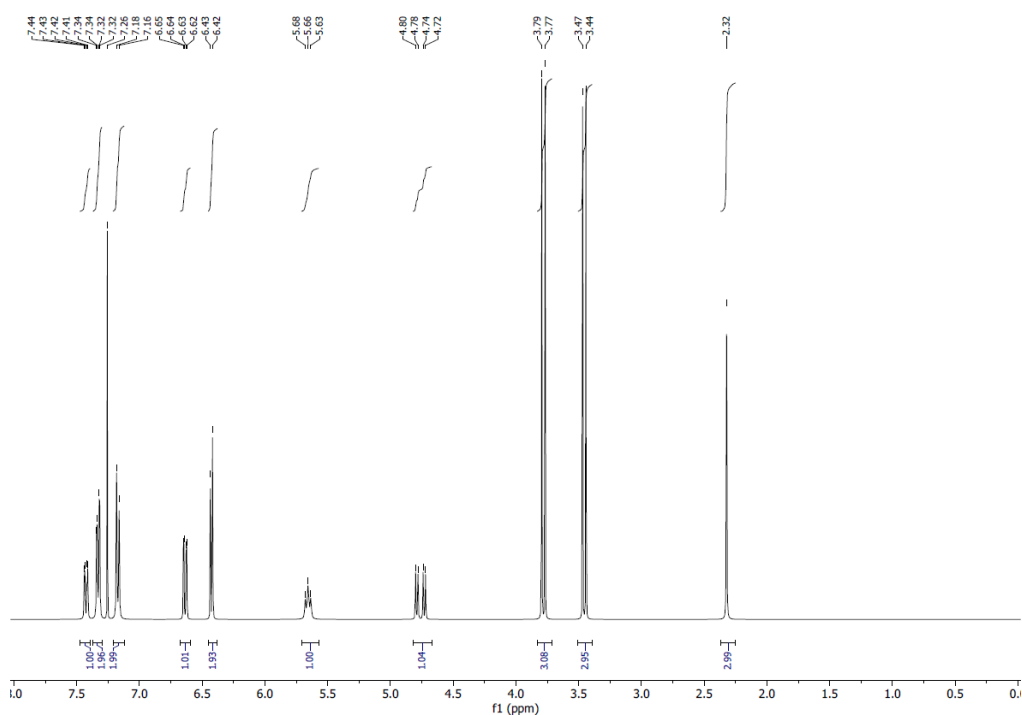

**Figure S5.**  $^1\text{H}$  NMR (400 MHz,  $\text{CDCl}_3$ ) spectra of compound **3**

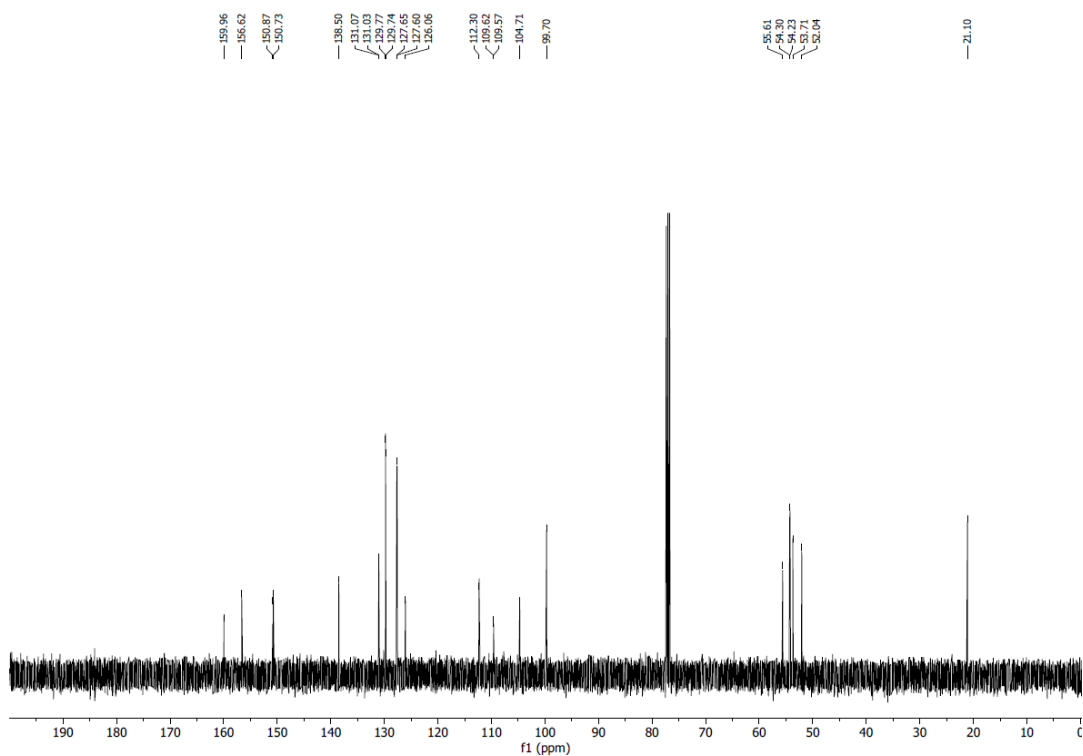

**Figure S6.**  $^{13}\text{C}$  NMR (100 MHz,  $\text{CDCl}_3$ ) spectra of compound **3**

**Dimethyl ((4-fluorophenyl)((2-oxo-4-(trifluoromethyl)-2H-chromen-7-yl)amino)methyl)phosphonate (**4**).**  $^1\text{H}$  NMR (400 MHz,  $\text{CDCl}_3$ )  $\delta$  7.44 (ddt,  $J$  = 8.8, 5.5, 2.1 Hz, 3H), 7.12–6.99 (m, 2H), 6.65 (dd,  $J$  = 8.9, 2.4 Hz, 1H), 6.48–6.37 (m, 2H), 5.94 (t,  $J$  = 8.8 Hz, 1H), 4.80 (dd,  $J$  = 24.1, 7.7 Hz, 1H), 3.79 (d,  $J$  = 10.8 Hz, 3H), 3.51 (d,  $J$  = 10.6 Hz, 3H);  $^{13}\text{C}$  NMR (100 MHz,  $\text{CDCl}_3$ )  $\delta$  159.8, 156.6, 150.5, 150.3, 130.0, 129.5, 129.4, 129.3, 126.2, 116.3, 116.2, 116.1, 116.0, 112.1, 110.0, 104.9, 99.7, 60.3, 54.2, 54.1, 53.8, 53.7.

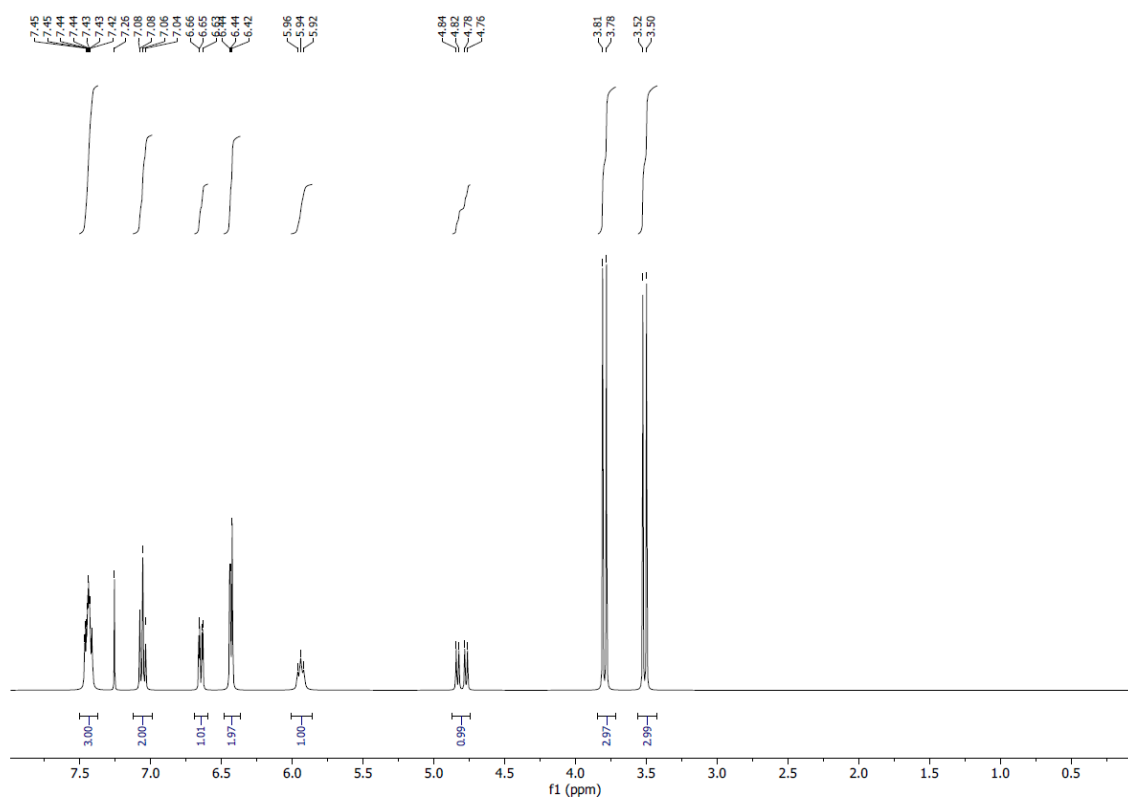

**Figure S7.** <sup>1</sup>H NMR (400 MHz, CDCl<sub>3</sub>) spectra of compound 4

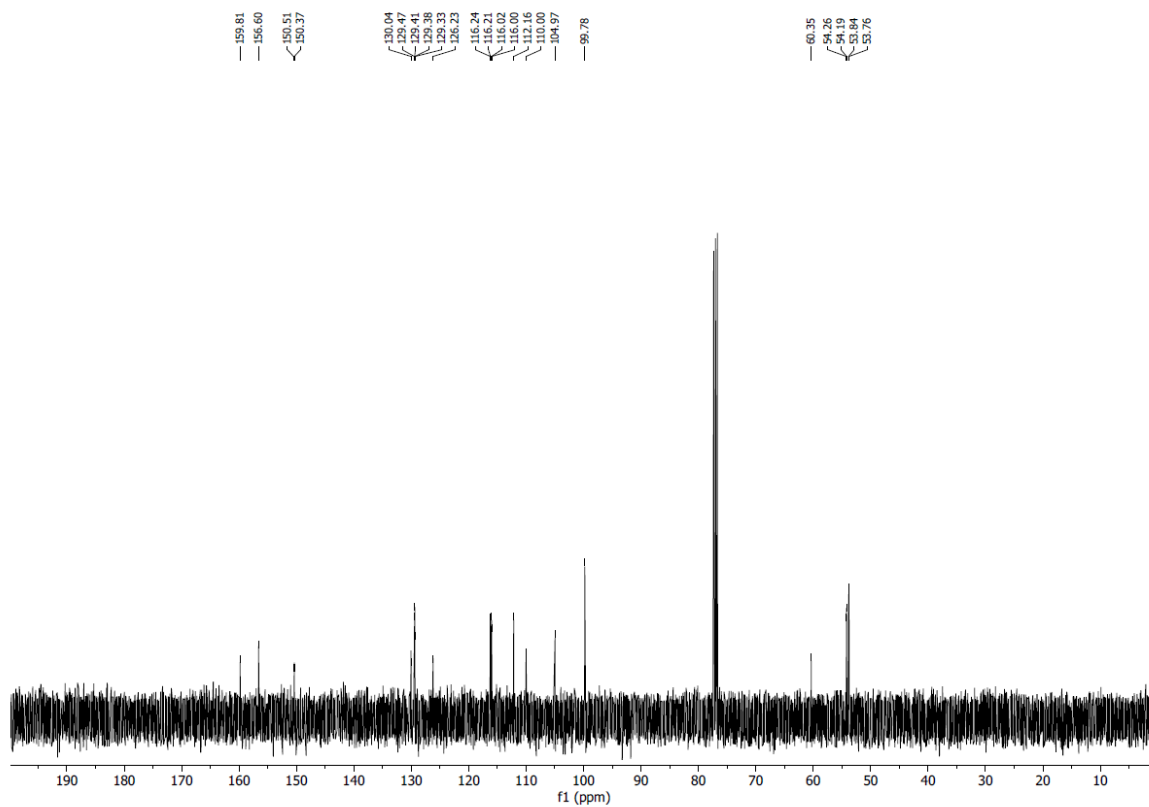

**Figure S8.** <sup>13</sup>C NMR (100 MHz, CDCl<sub>3</sub>) spectra of compound 4

**Dimethyl ((4-bromophenyl)((2-oxo-4-(trifluoromethyl)-2H-chromen-7-yl)amino)**

**methyl)phosphonate (5).**  $^1\text{H}$  NMR (400 MHz,  $\text{CDCl}_3$ )  $\delta$  7.49 (d,  $J$  = 8.4 Hz, 2H), 7.43 (dd,  $J$  = 8.9, 1.9 Hz, 1H), 7.37–7.29 (m, 2H), 6.63 (dd,  $J$  = 8.9, 2.4 Hz, 1H), 6.43 (d,  $J$  = 8.4 Hz, 2H), 5.84 (t,  $J$  = 8.8 Hz, 1H), 4.77 (dd,  $J$  = 24.4, 7.5 Hz, 1H), 3.80 (d,  $J$  = 10.9 Hz, 3H), 3.53 (d,  $J$  = 10.7 Hz, 3H);  $^{13}\text{C}$  NMR (100 MHz,  $\text{CDCl}_3$ )  $\delta$  159.7, 156.5, 150.2, 141.4, 133.4, 132.3, 132.2, 129.3, 126.2, 122.7, 112.1, 105.0, 99.8, 55.4, 54.3, 54.2, 53.9, 53.8.

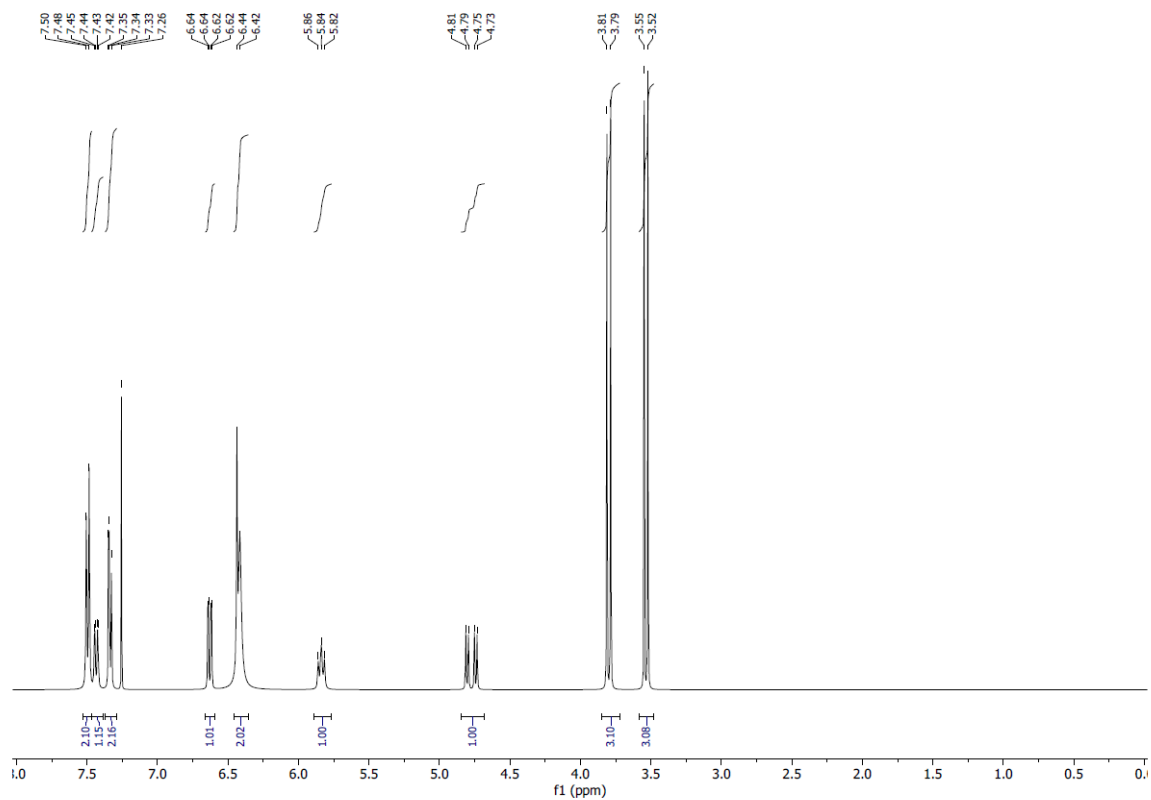

**Figure S9.**  $^1\text{H}$  NMR (400 MHz,  $\text{CDCl}_3$ ) spectra of compound **5**

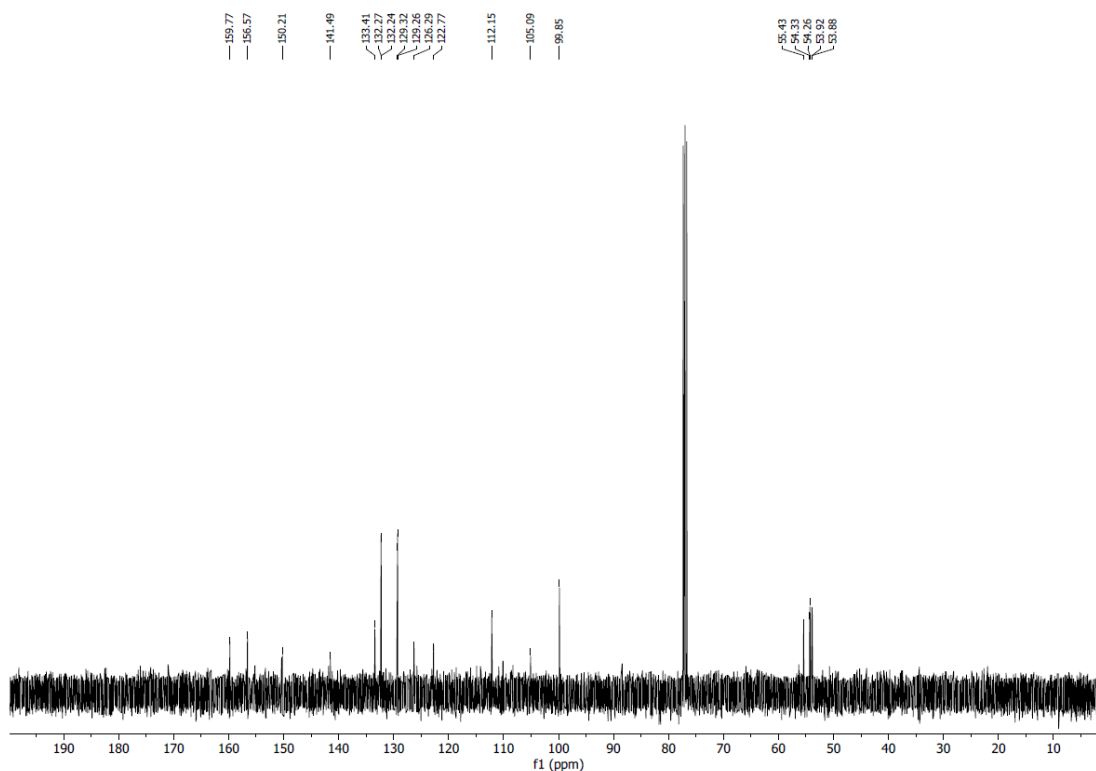

**Figure S10.**  $^{13}\text{C}$  NMR (100 MHz,  $\text{CDCl}_3$ ) spectra of compound **5**

**Dimethyl ((4-iodophenyl)((2-oxo-4-(trifluoromethyl)-2H-chromen-7-yl)amino) methyl)phosphonate (6).**  $^1\text{H}$  NMR (400 MHz,  $\text{CDCl}_3$ )  $\delta$  7.69 (d,  $J$  = 7.8 Hz, 2H), 7.42 (dd,  $J$  = 8.9, 1.9 Hz, 1H), 7.21 (dd,  $J$  = 8.5, 2.3 Hz, 2H), 6.63 (dd,  $J$  = 8.9, 2.4 Hz, 1H), 6.42 (d,  $J$  = 7.8 Hz, 2H), 5.94 (dd,  $J$  = 9.7, 7.7 Hz, 1H), 4.76 (dd,  $J$  = 24.4, 7.6 Hz, 1H), 3.80 (d,  $J$  = 10.8 Hz, 3H), 3.54 (d,  $J$  = 10.7 Hz, 3H);  $^{13}\text{C}$  NMR (100 MHz,  $\text{CDCl}_3$ )  $\delta$  159.7, 156.5, 150.4, 150.2, 138.1, 134.1, 129.5, 126.2, 123.0, 112.1, 110.0, 105.0, 99.8, 94.3, 55.5, 54.3, 54.0, 53.9, 53.8.

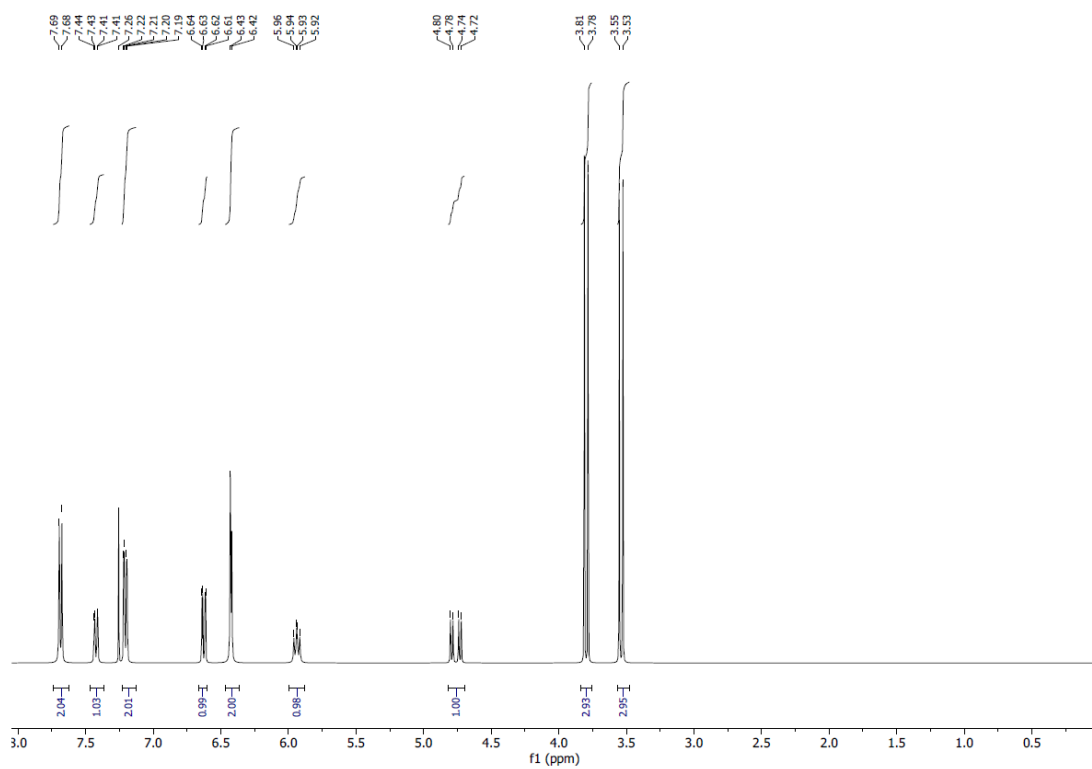

Figure S11. <sup>1</sup>H NMR (400 MHz, CDCl<sub>3</sub>) spectra of compound 6

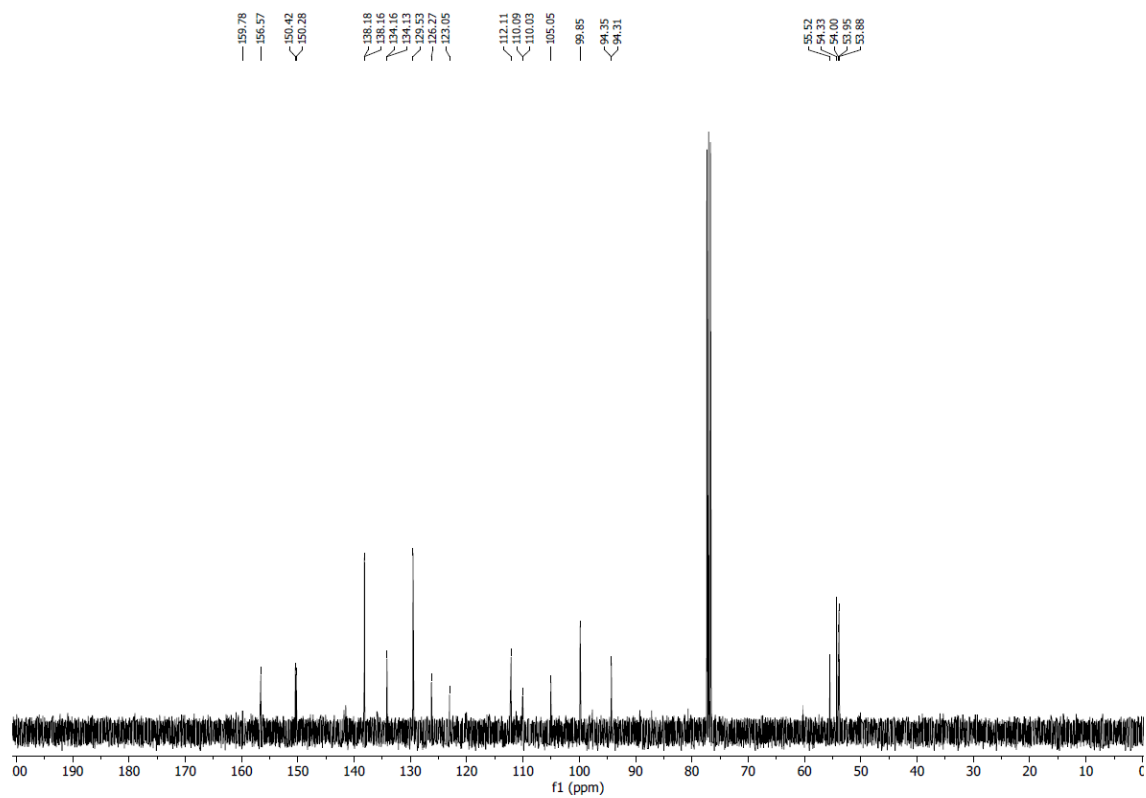

Figure S12. <sup>13</sup>C NMR (100 MHz, CDCl<sub>3</sub>) spectra of compound 6

**Dimethyl ((4-chlorophenyl)((2-oxo-4-(trifluoromethyl)-2H-chromen-7-yl)amino)methyl)phosphonate (7).**  $^1\text{H}$  NMR (400 MHz,  $\text{CDCl}_3$ )  $\delta$  7.44–7.39 (m, 2H), 7.34 (d,  $J = 8.7$  Hz, 2H), 6.72–6.60 (m, 1H), 6.43 (d,  $J = 8.7$  Hz, 2H), 5.80 (t,  $J = 8.6$  Hz, 1H), 4.79 (dd,  $J = 24.3, 7.5$  Hz, 1H), 3.80 (d,  $J = 10.8$  Hz, 3H), 3.53 (d,  $J = 10.8$  Hz, 3H);  $^{13}\text{C}$  NMR (100 MHz,  $\text{CDCl}_3$ )  $\delta$  159.7, 156.5, 150.2, 134.6, 132.8, 129.3, 129.2, 129.0, 128.9, 126.2, 112.1, 110.0, 105.0, 99.8, 55.3, 54.3, 53.9, 53.8.

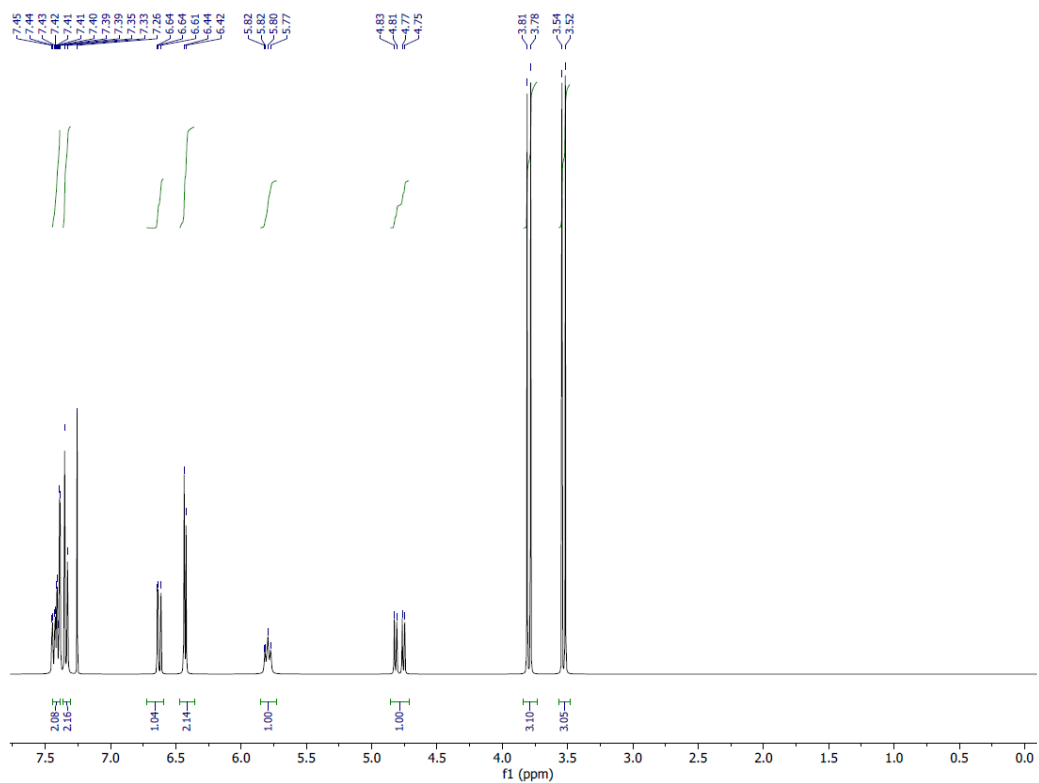

**Figure S13.**  $^1\text{H}$  NMR (400 MHz,  $\text{CDCl}_3$ ) spectra of compound **7**

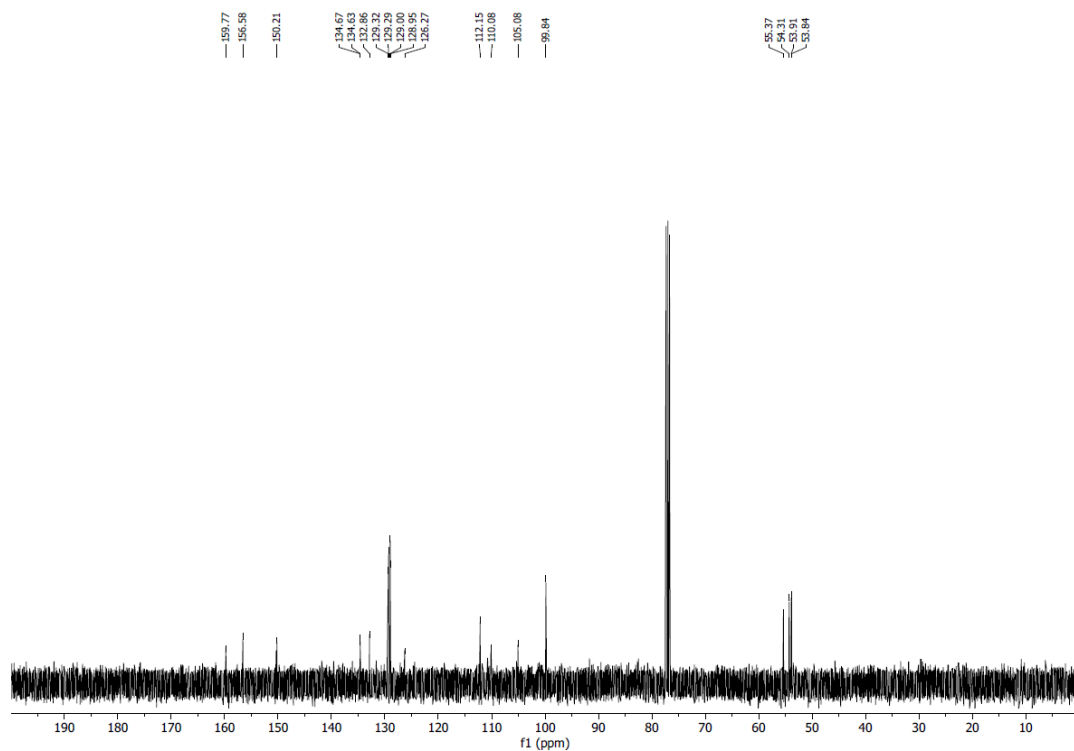

**Figure S14.**  $^{13}\text{C}$  NMR (400 MHz,  $\text{CDCl}_3$ ) spectra of compound **7**

**Dimethyl ((3-nitrophenyl)((2-oxo-4-(trifluoromethyl)-2H-chromen-7-yl)amino) methyl)phosphonate (8).**  $^1\text{H}$  NMR (400 MHz,  $\text{CDCl}_3$ )  $\delta$  8.36 (d,  $J$  = 2.2 Hz, 1H), 8.16 (dd,  $J$  = 8.2, 1.0 Hz, 1H), 7.82 (d,  $J$  = 7.6 Hz, 1H), 7.56 (t,  $J$  = 8.0 Hz, 1H), 7.43 (dd,  $J$  = 8.9, 1.9 Hz, 1H), 6.67 (dd,  $J$  = 8.9, 2.4 Hz, 1H), 6.44 (s, 2H), 6.28 (t,  $J$  = 8.7 Hz, 1H), 4.98 (dd,  $J$  = 24.9, 7.7 Hz, 1H), 3.86 (d,  $J$  = 10.9 Hz, 3H), 3.65 (d,  $J$  = 10.8 Hz, 3H);  $^{13}\text{C}$  NMR (100 MHz,  $\text{CDCl}_3$ )  $\delta$  156.5, 150.2, 150.0, 148.7, 137.2, 137.1, 133.8, 133.7, 129.9, 129.9, 126.4, 123.5, 123.5, 122.4, 122.3, 111.9, 105.2, 99.8, 55.3, 54.3, 54.1, 53.8.

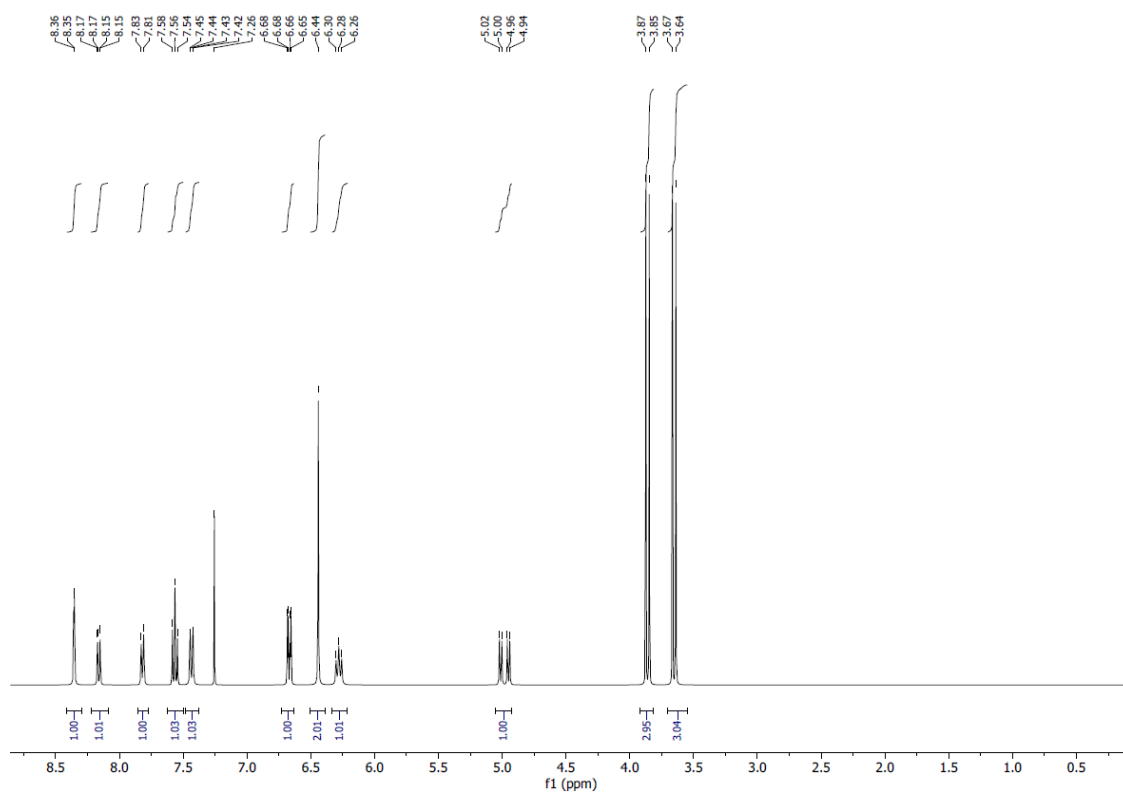

Figure S15. <sup>1</sup>H NMR (400 MHz, CDCl<sub>3</sub>) spectra of compound 8

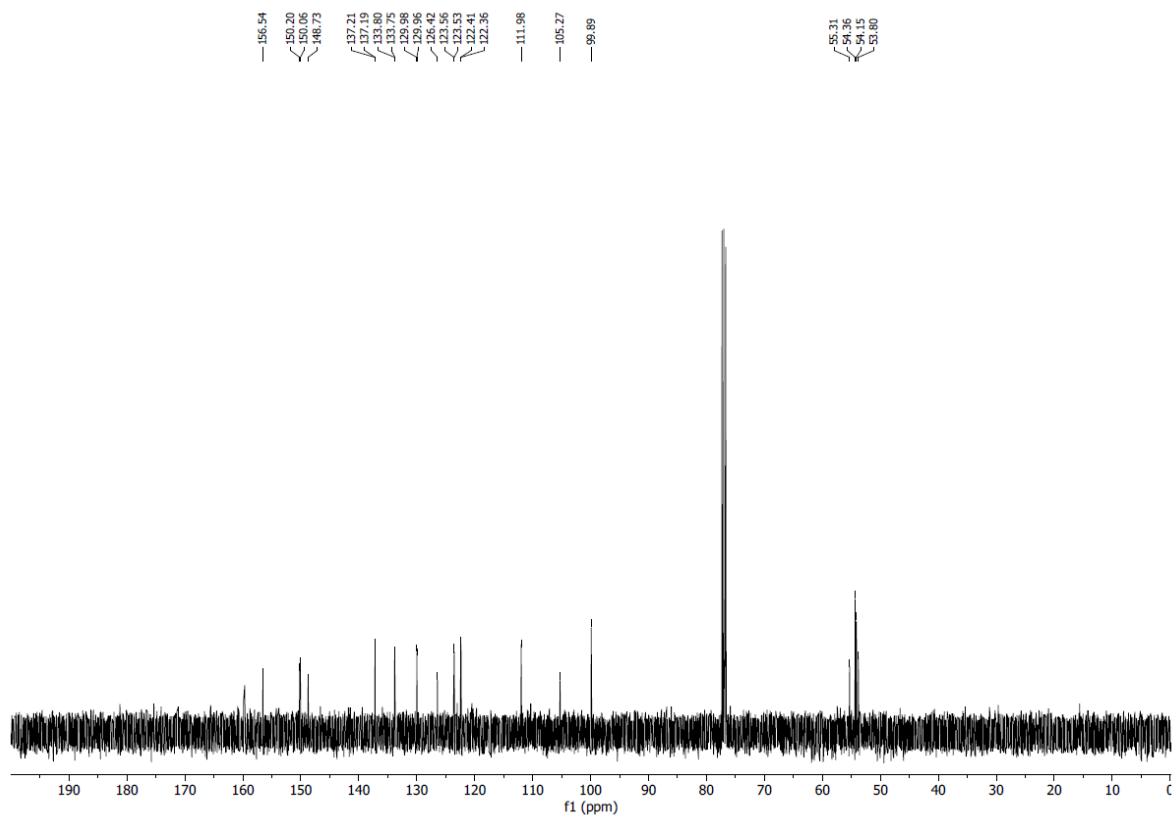

Figure S16. <sup>13</sup>C NMR (100 MHz, CDCl<sub>3</sub>) spectra of compound 8

**Dimethyl ((4-nitrophenyl)((2-oxo-4-(trifluoromethyl)-2H-chromen-7-yl)amino) methyl)phosphonate (9).**  $^1\text{H}$  NMR (400 MHz,  $\text{CDCl}_3$ )  $\delta$  8.21 (d,  $J = 8.8$  Hz, 2H), 7.66 (d,  $J = 11.0$  Hz, 2H), 7.47 – 7.39 (m, 1H), 6.63 (dd,  $J = 8.9, 2.4$  Hz, 1H), 6.43 (d,  $J = 8.8$  Hz, 2H), 6.01 (dd,  $J = 10.0, 7.4$  Hz, 1H), 4.96 (dd,  $J = 25.2, 7.5$  Hz, 1H), 3.83 (d,  $J = 10.8$  Hz, 3H), 3.62 (d,  $J = 10.8$  Hz, 3H);  $^{13}\text{C}$  NMR (100 MHz,  $\text{CDCl}_3$ )  $\delta$  159.5, 156.5, 150.0, 149.9, 148.0, 142.1, 142.0, 128.6, 128.5, 124.1, 111.9, 105.3, 99.9, 55.6, 54.3, 54.2, 54.1, 54.0.

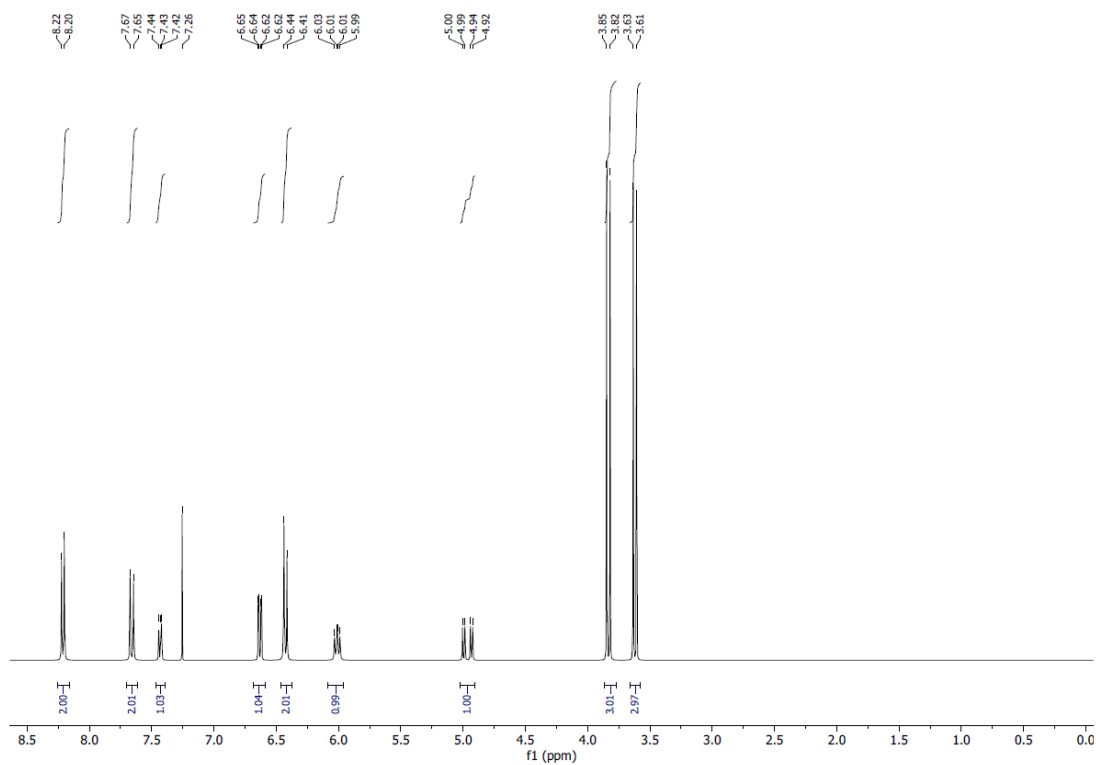

**Figure S17.**  $^1\text{H}$  NMR (400 MHz,  $\text{CDCl}_3$ ) spectra of compound 9

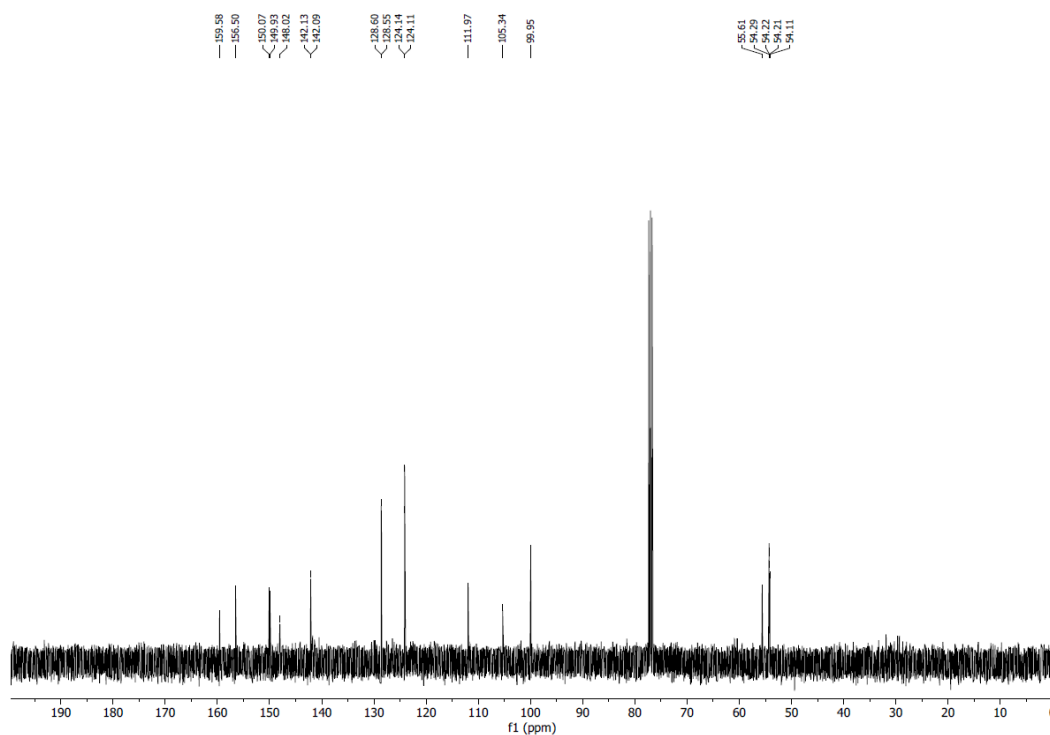

**Figure S18.**  $^{13}\text{H}$  NMR (100 MHz,  $\text{CDCl}_3$ ) spectra of compound **9**

**Dimethyl ((furan-2-yl)((2-oxo-4-(trifluoromethyl)-2H-chromen-7-yl)amino) methyl)phosphonate (10).**  $^1\text{H}$  NMR (400 MHz,  $\text{CDCl}_3$ )  $\delta$  7.50–7.42 (m, 1H), 7.41 (q,  $J$  = 1.6 Hz, 1H), 6.67 (dd,  $J$  = 8.9, 2.4 Hz, 1H), 6.57 (d,  $J$  = 2.4 Hz, 1H), 6.45 (s, 2H), 6.36 (dd,  $J$  = 3.4, 1.9 Hz, 1H), 5.52 (t,  $J$  = 8.0 Hz, 1H), 4.95 (dd,  $J$  = 23.5, 8.7 Hz, 1H), 3.81 (d,  $J$  = 10.8 Hz, 3H), 3.63 (d,  $J$  = 10.7 Hz, 3H);  $^{13}\text{C}$  NMR (100 MHz,  $\text{CDCl}_3$ )  $\delta$  159.8, 156.6, 150.3, 150.2, 147.5, 143.1, 126.2, 112.1, 111.0, 110.9, 109.5, 105.1, 99.6, 54.1, 53.9, 53.8, 48.2.

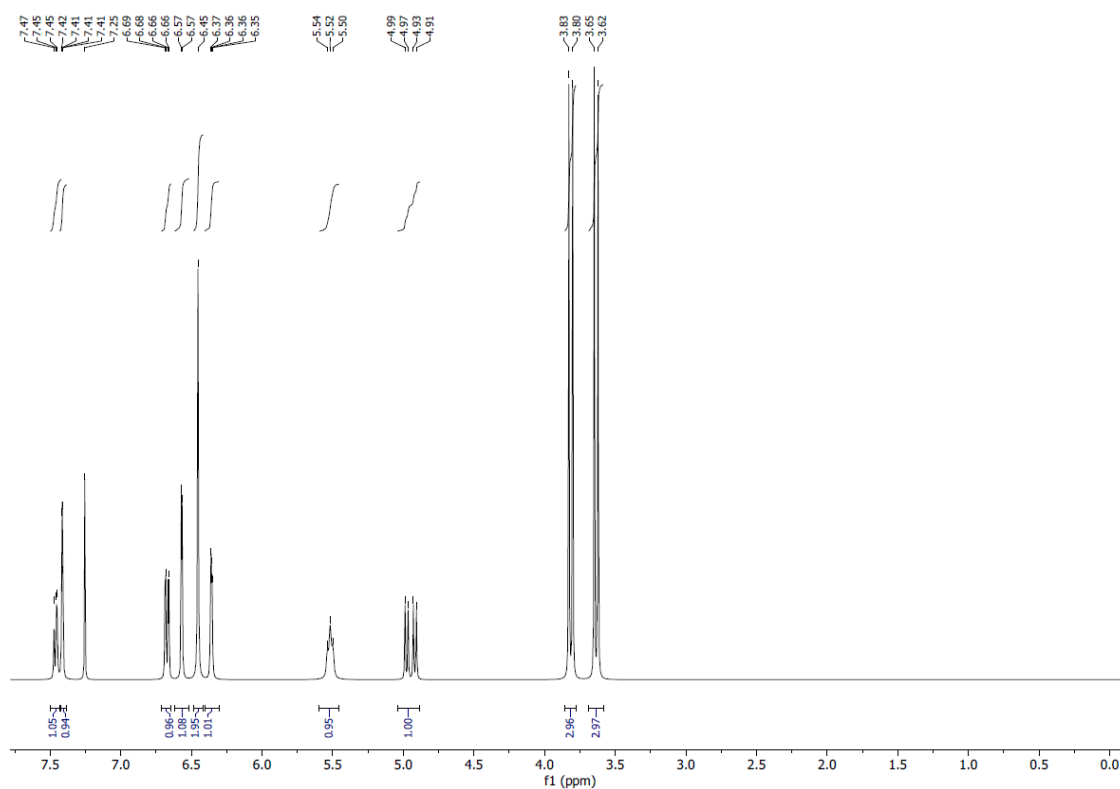

Figure S19. <sup>1</sup>H NMR (400 MHz, CDCl<sub>3</sub>) spectra of compound 10

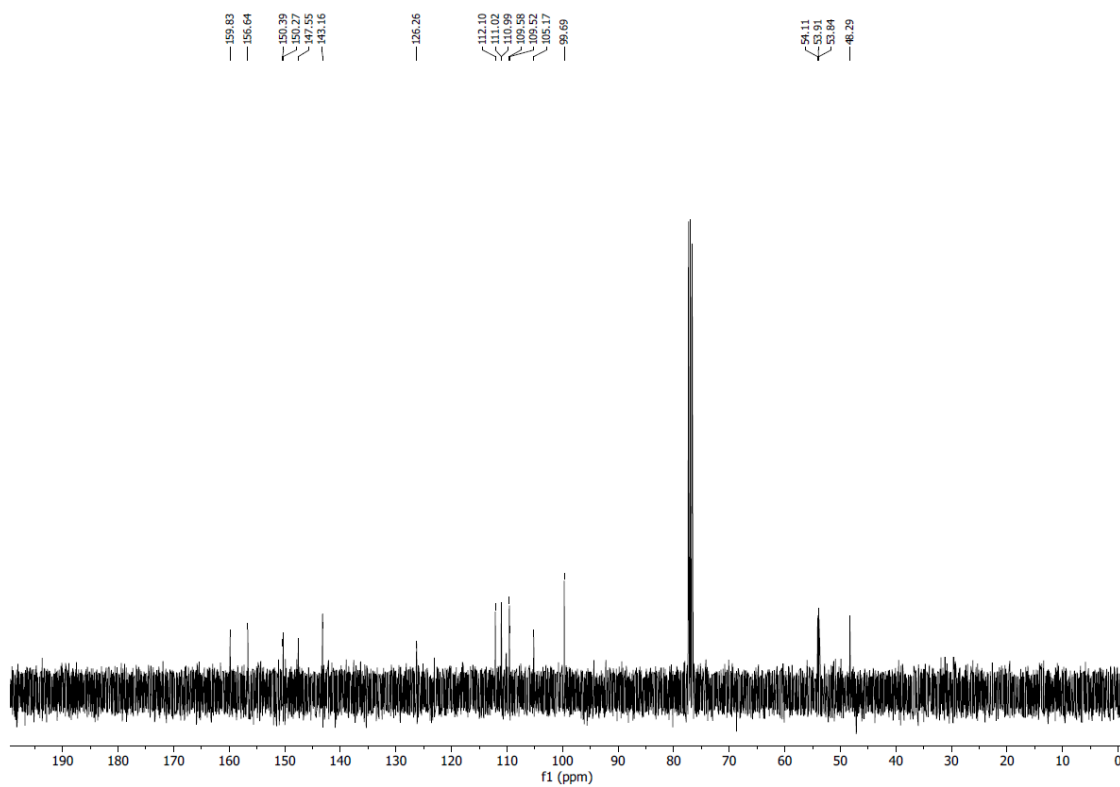

Figure S20. <sup>13</sup>C NMR (100 MHz, CDCl<sub>3</sub>) spectra of compound 10

**Dimethyl ((tiophen-2-yl)((2-oxo-4-(trifluoromethyl)-2H-chromen-7-yl)amino) methyl)phosphonate (11).**  $^1\text{H}$  NMR (400 MHz,  $\text{CDCl}_3$ )  $\delta$  7.46 (dd,  $J = 9.0, 1.9$  Hz, 1H), 7.30–7.25 (m, 1H), 7.20 (td,  $J = 2.9, 2.4, 1.7$  Hz, 1H), 7.00 (ddd,  $J = 5.1, 3.6, 0.7$  Hz, 1H), 6.70 (dd,  $J = 8.9, 2.4$  Hz, 1H), 6.58 (s, 1H), 6.45 (s, 1H), 5.79 (t,  $J = 8.2$  Hz, 1H), 5.11 (dd,  $J = 23.7, 8.0$  Hz, 1H), 3.81 (d,  $J = 10.8$  Hz, 3H), 3.61 (d,  $J = 10.6$  Hz, 3H);  $^{13}\text{C}$  NMR (100 MHz,  $\text{CDCl}_3$ )  $\delta$  159.8, 156.6, 150.4, 150.3, 137.6, 137.5, 127.4, 127.0, 126.9, 126.2, 126.1, 112.1, 110.1, 110.0, 105.1, 99.8, 54.4, 54.3, 53.9, 51.7, 50.1.

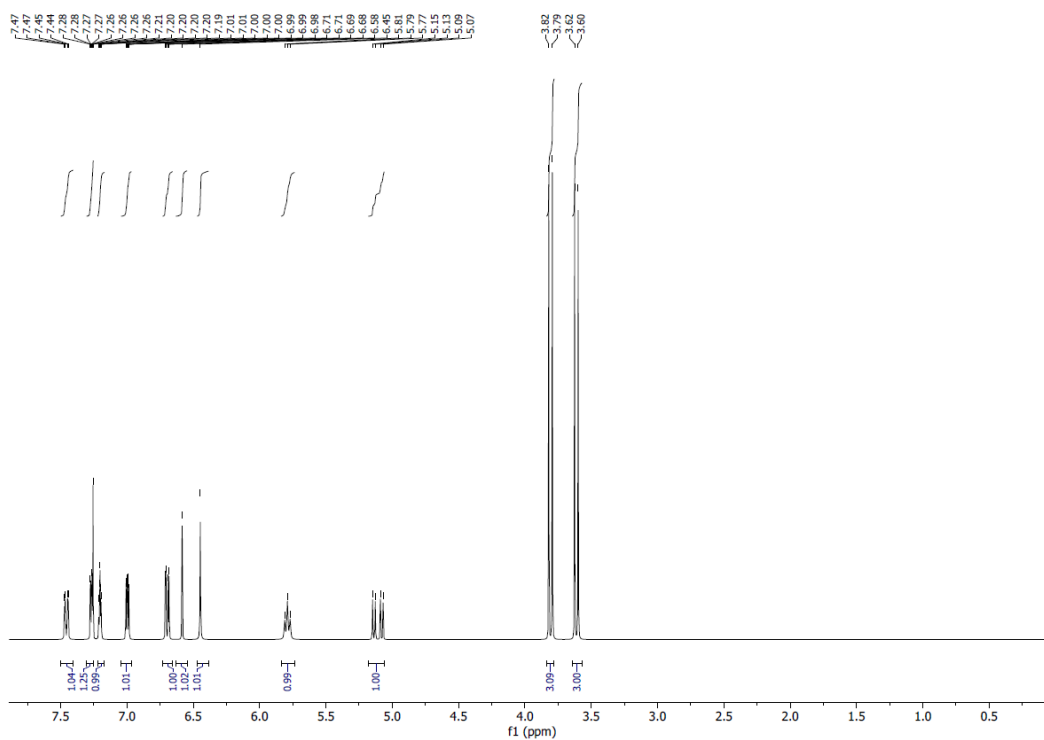

**Figure S21.**  $^1\text{H}$  NMR (400 MHz,  $\text{CDCl}_3$ ) spectra of compound **11**

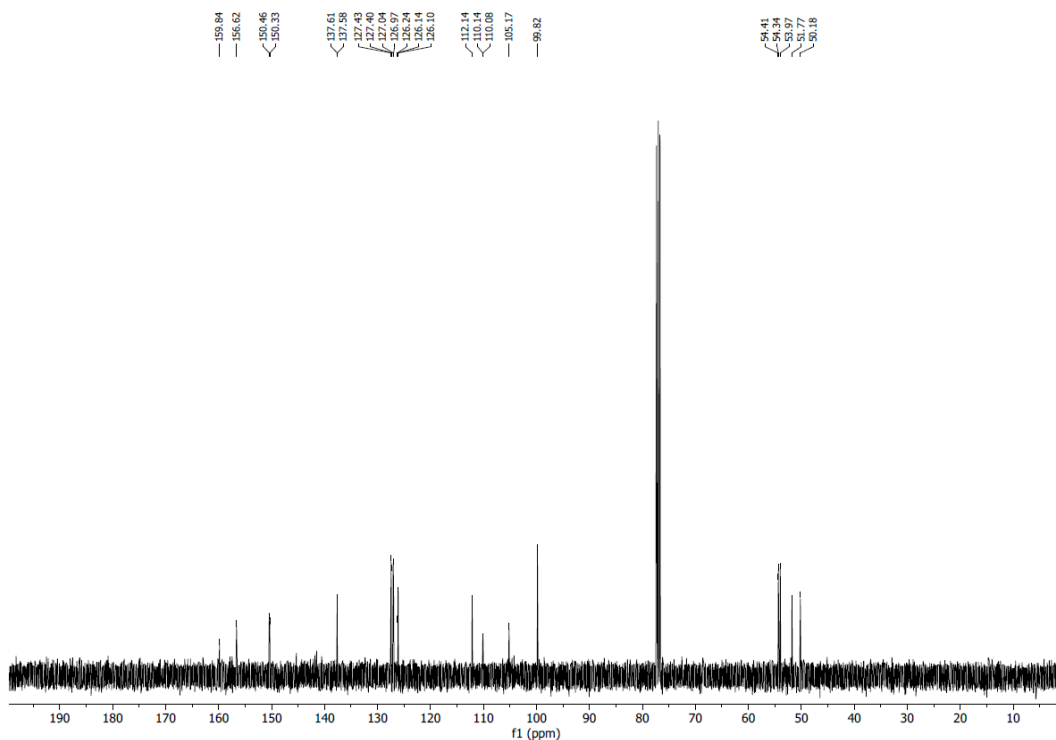

**Figure S22.**  $^{13}\text{C}$  NMR (100 MHz,  $\text{CDCl}_3$ ) spectra of compound **11**

**Dimethyl ((naphthalen-1-yl)((2-oxo-4-(trifluoromethyl)-2H-chromen-7-yl)amino)**

**methyl)phosphonate (12).**  $^1\text{H}$  NMR (400 MHz,  $\text{CDCl}_3$ )  $\delta$  7.97 (s, 1H), 7.86–7.69 (m, 3H), 7.62 (d,  $J$  = 8.6 Hz, 1H), 7.49–7.39 (m, 2H), 7.35 (dd,  $J$  = 8.9, 2.0 Hz, 1H), 6.76–6.66 (m, 1H), 6.61 (t,  $J$  = 8.6 Hz, 1H), 6.55 (s, 1H), 6.37 (s, 1H), 5.05 (dd,  $J$  = 24.3, 7.9 Hz, 1H), 3.85 (d,  $J$  = 10.9 Hz, 3H), 3.48 (d,  $J$  = 10.6 Hz, 3H);  $^{13}\text{C}$  NMR (100 MHz,  $\text{CDCl}_3$ )  $\delta$  159.9, 156.5, 151.0, 150.9, 141.7, 141.4, 133.2, 131.8, 128.9, 128.9, 127.9, 127.7, 127.1, 127.0, 126.5, 126.0, 125.2, 125.1, 123.1, 120.3, 112.1, 109.5, 109.5, 104.6, 99.8, 56.0, 54.5, 54.3, 54.2, 53.8.

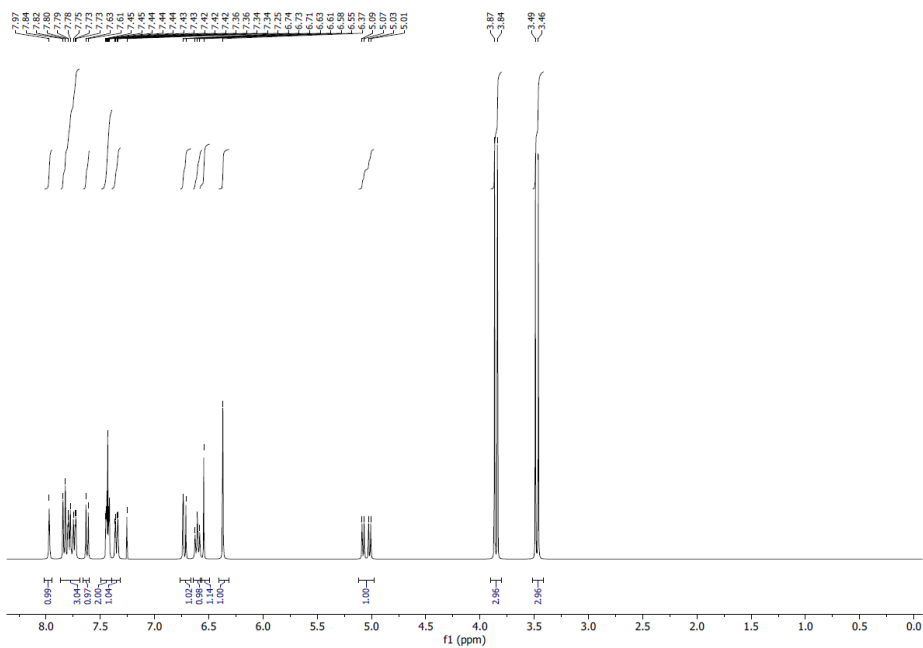

**Figure S23.**  $^1\text{H}$  NMR (400 MHz,  $\text{CDCl}_3$ ) spectra of compound **12**

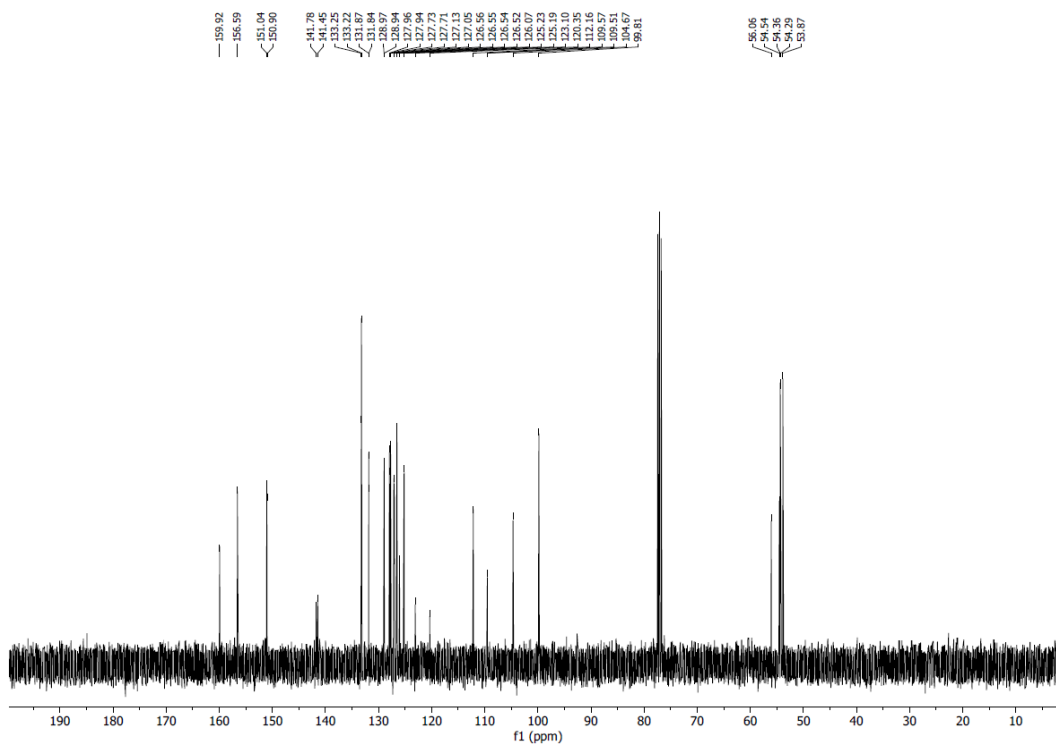

**Figure S24.**  $^{13}\text{C}$  NMR (100 MHz,  $\text{CDCl}_3$ ) spectra of compound **12**

**Dimethyl ((phenyl)((2-oxo-4-(trifluoromethyl)-2H-chromen-7-yl)amino)methyl) phosphonate (13).**

$^1\text{H}$  NMR (400 MHz,  $\text{CDCl}_3$ )  $\delta$  7.49–7.40 (m, 2H), 7.39–7.27 (m, 4H), 6.58 (dd,  $J = 8.7, 2.4$  Hz, 1H), 6.40 (s, 1H), 5.95 (s, 1H), 5.49 (dd,  $J = 9.9, 7.7$  Hz, 1H), 4.80 (dd,  $J = 24.2, 7.7$  Hz, 1H);  $^{13}\text{C}$  NMR (100 MHz,  $\text{CDCl}_3$ )  $\delta$  161.5, 155.5, 152.6, 149.6, 149.5, 134.5, 128.9, 128.5, 128.4, 127.7, 125.4, 111.6, 111.3, 110.2, 99.7, 56.0, 54.5, 53.7, 53.6, 18.4.

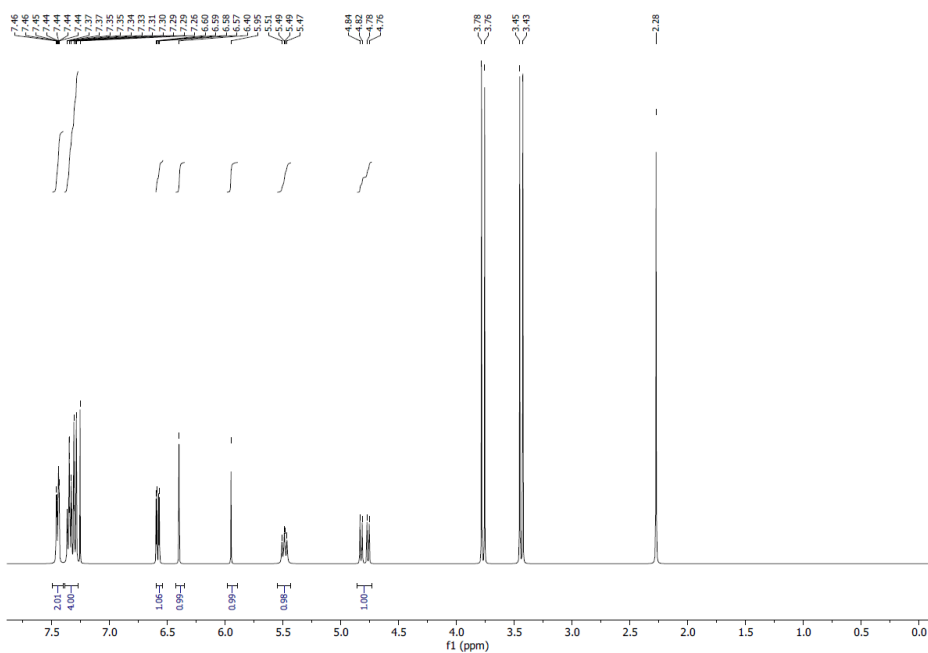

**Figure S25.**  $^1\text{H}$  NMR (400 MHz,  $\text{CDCl}_3$ ) spectra of compound **13**

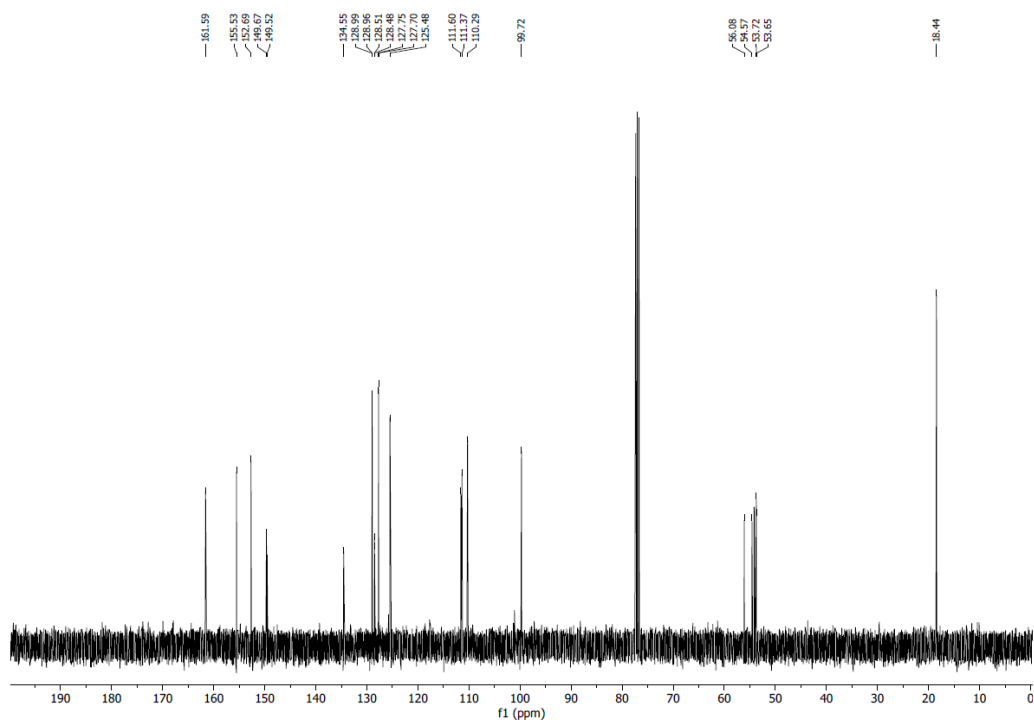

**Figure S26.**  $^{13}\text{H}$  NMR (100 MHz,  $\text{CDCl}_3$ ) spectra of compound **13**

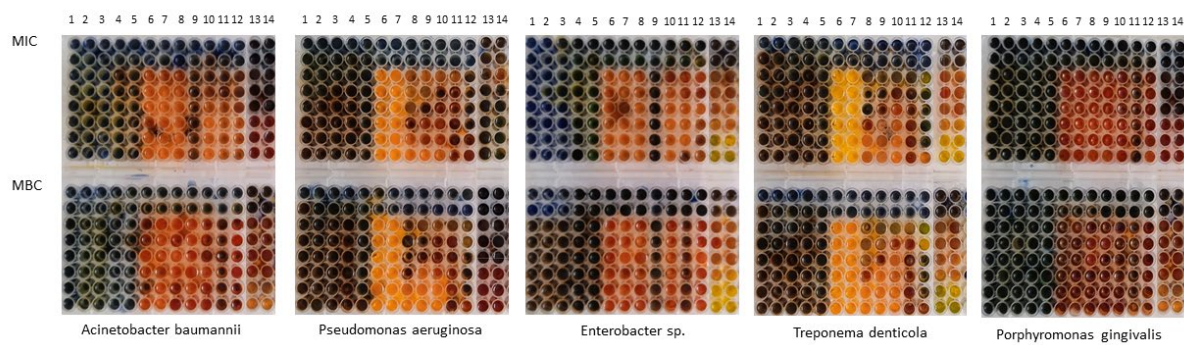

**Figure S27.** Examples of MIC and MBC on microplates with different concentration of studied compounds ( $\mu\text{g/mL}^{-1}$ ). Resazurin was added as an indicator of microbial growth with pathogenic analysed strains of with tested compounds.
